# Supplementary material for: Genome wide identification, characterization and expression profiles of heavy metal ATPase3 (HMA3) in plants
Source: Research Square preprint supplement (doi:10.21203/rs.3.rs-110370/v1), 2020-11-20
Supplement: Supplementary file 1 [file fffceb4b2edf60b5e08999d5.docx]

**Genome-wide identification, characterization and expression profiles of heavy metal ATPase 3 (HMA3) in plants**

**Ahmad Humayan Kabir1*, Urmi Das1, AFM Mohabubul Haque1, Amit Kumar Dutta2, Gholamreza Gohari3*, Md Abu Reza2**

1Molecular Plant Physiology Laboratory, Department of Botany, University of Rajshahi, Rajshahi 6205, Bangladesh; AHK: [ahmad.kabir@ru.ac.bd](mailto:ahmad.kabir@ru.ac.bd), UD: [dasurmi2911@gmail.com](mailto:dasurmi2911@gmail.com), AFMMH: [mahabub_90@yahoo.com](mailto:mahabub_90@yahoo.com)

2Department of Genetic Engineering and Biotechnology, University of Rajshahi, Rajshahi 6205, Bangladesh; AKD: [amitdutta_81@yahoo.com](mailto:amitdutta_81@yahoo.com), MAR: [reza.gen@ru.ac.bd](mailto:reza.gen@ru.ac.bd)

3Department of Horticulture, Faculty of Agriculture, University of Maragheh, Iran; [gohari.gh@maragheh.ac.ir](mailto:gohari.gh@maragheh.ac.ir)

*Corresponding author: [gohari.gh@maragheh.ac.ir](mailto:gohari.gh@maragheh.ac.ir) (GG)

*Co-corresponding author: [ahmad.kabir@ru.ac.bd](mailto:ahmad.kabir@ru.ac.bd) (AHK)


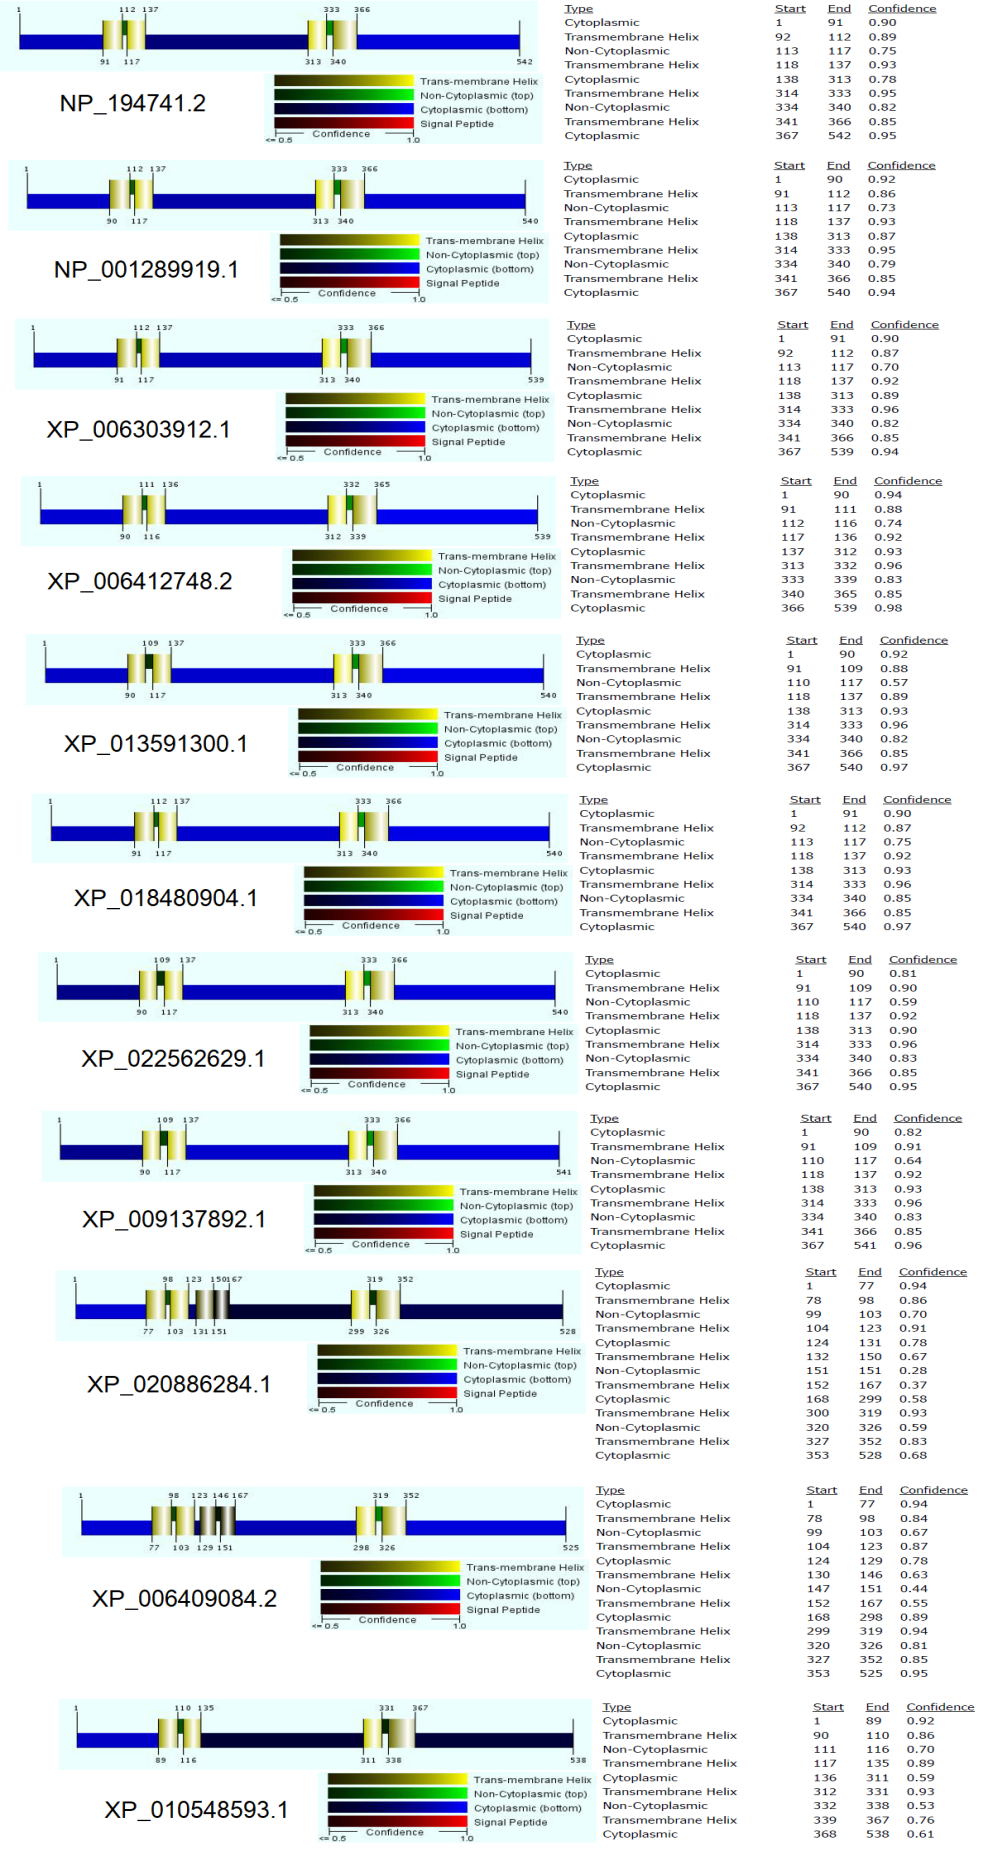


**Fig. S.1**. Prediction of transmembrane helix of HMA3 protein homologs.


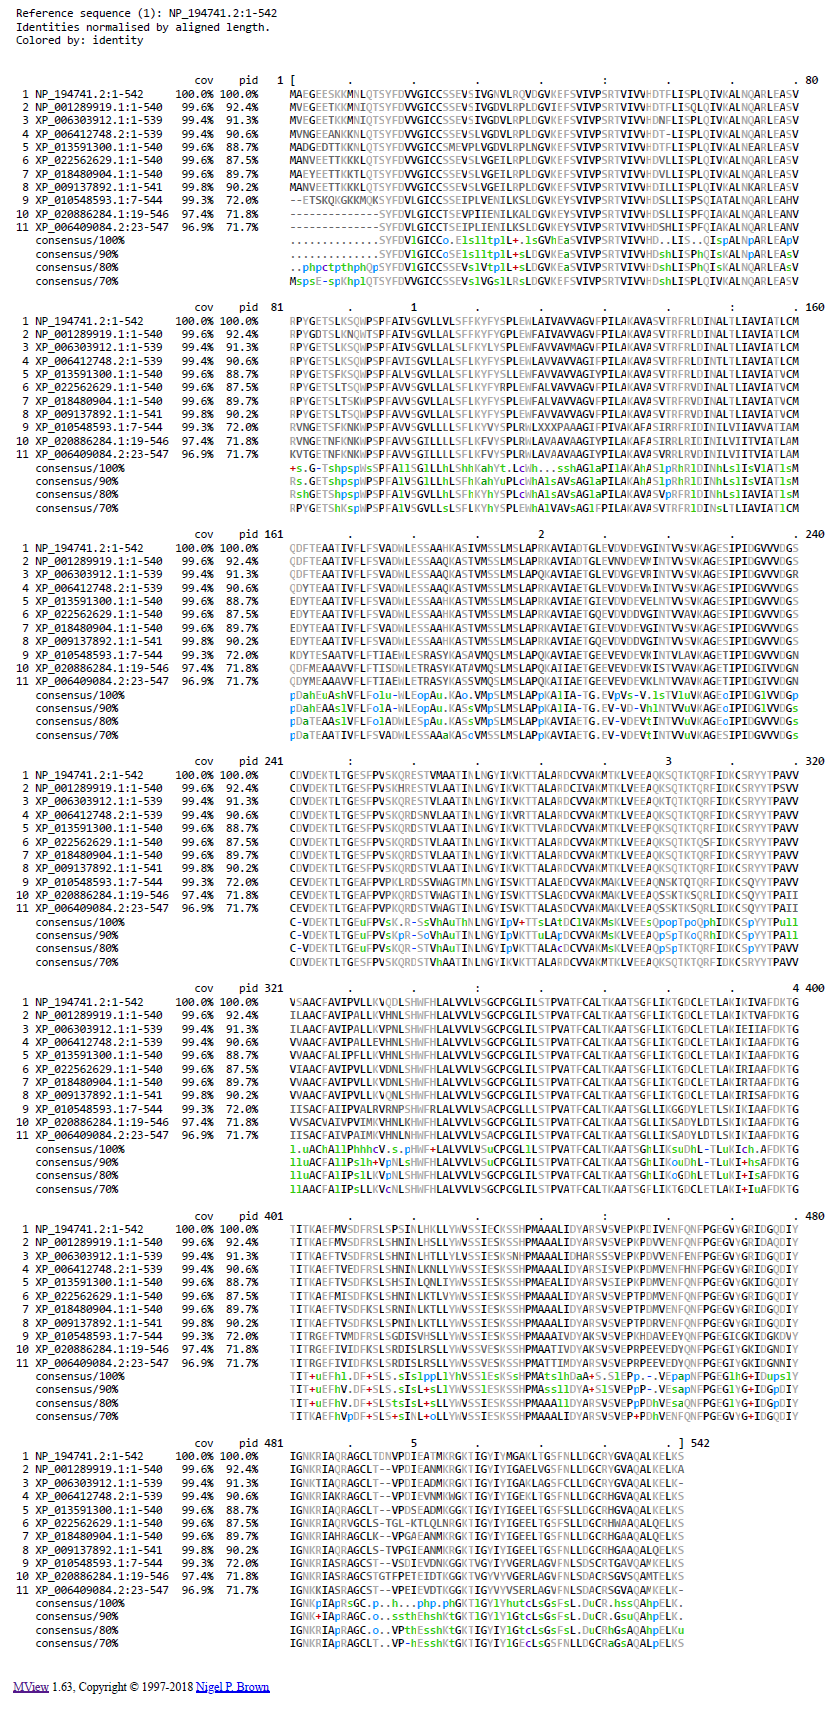


**Fig. S.2**. Multiple sequence alignment of HMA3protein homologs.
